# Supplementary material for: Exploring the phenotypic consequences of tissue specific gene expression variation inferred from GWAS summary statistics
Source: PubMed Central journal article supplement (PMC5940825; doi:10.1038/s41467-018-03621-1), 2018-05-08
Supplement: 41467_2018_3621_MOESM3_ESM.pdf [file 41467_2018_3621_MOESM3_ESM.pdf]

## Description of Additional Supplementary Files

### **File Name: Supplementary Data 1**

#### **Description: ClinVar genes with significant association in MetaXcan**

Columns are: ClinVar disease name; gene2pheno.org phenotype name; gene name; p-value of the association; tissue where the model was trained.

### **List of Genome-wide Association Meta Analysis (GWAMA) Consortia and phenotypes**

Columns are consortium name; study name; gene2pheno.org display name; link to pubmed entry if available; study sample size; study population; # of significant gene-tissue pairs; # of significant unique genes; # remaining after filtering prediction performance; # remaining after discarding high non-shared signals probability; # remaining after discarding undetermined results from last column.

### **File Name: Supplementary Data 3**

#### **Description: List of Significant Gene Association Results**

Columns are consortium name; gene2pheno.org display name; study name; gene name; tissue; zscore; p-value; probability of 'undetermined' colocalization; probability of non-shared signals; probability of colocalized signals.

### **File Name: Supplementary Data 4**

#### **Description: MetaXcan results for *C4A*, *PCSK9*, *SORT1***

Columns are gene name; study name; gene2pheno.org display name; tissue; effect size; zscore; S-PrediXcan p-value; probability of no causal SNP in either GWAS or eQTL; probability of causal SNP only in GWAS; probability of causal SNP only in eQTL; probability of non-shared signals, probability of colocalized signals, prediction performance cross-validated  $R^2$ , prediction performance cross-validated p-value; prediction performance false discovery ratio; number of SNPs used in S-PrediXcan, number of snps available in the model; SMR p-value; HEIDI probability; S-TWAS p-
